# Supplementary material for: Molecular evolution of TRPC4 regulatory sequences supports a role in mammalian thermoregulatory adaptation
Source: PeerJ. 2025 Jul 8;13:e19697. doi: 10.7717/peerj.19697 (PMC12248226; doi:10.7717/peerj.19697)
Supplement: Supplemental Information 2 — Outputs are grouped by analysis on each page of the worksheet. [file peerj-13-19697-s002.xlsx]

## Sheet: basal.eutheria.branch.tests
Supplemental File S2. Selected model outputs of each evolutionary analysis are presented by page. The parameter ω is the estimated ratio of nonsynonymous to synonymous substitutions in the data set. NSsites and Model are control parameters used by PAML v. 4.9 (Yang Z. 2007. PAML 4: phylogenetic analysis by maximum likelihood. Molecular biology and evolution 24:1586–1591. DOI: 10.1093/molbev/msm08…
PAML branch test of rate heterogeneity																aBSREL test of branch-site positive selection
Gene	ω0 clade	ω1 clade	ω2 clade	Sequences	Aligned codons	NSsites	Model	lnL	ω0	ω1	ω2	Hypothesis	Raw P-value	Adjusted P-value		Raw P-value	Adjusted P-value
Trpc4	Marsupialia + Monotremata	Eutheria	NA	14	338	0	2	-5578.78	0.14551	0.10148	NA	Null	NA	NA		NA	NA
	Marsupialia + Monotremata	Eutheria, basal branch	Eutheria excluding basal branch	14	338	0	2	-5567.66	0.14421	0.07849	0.34899	Alternative	2.40352e-06	NA		0.210218	NA

## Sheet: basal.vs.descendent.eutheria
Supplemental File S2. RELAX is a program of the HyPhy package (Pond SLK, Frost SDW, Muse SV. 2004. HyPhy: hypothesis testing using phylogenies. Bioinformatics 21:676–679. DOI: 10.1093/bioinformatics/bti079. DOI: 10.1093/bioinformatics/bti079). The parameter ω represents the ratio of nonsynonymous to synonymous substitutions with subscripts designating different rate classes attributed to a propor…
	RELAX test of rate heterogeneity
Gene	lnL	Background ω0	Background p0	Background ω1	Background p1	Foreground ω0	Foreground p0	Foreground ω1	Foreground p1	k (rate change parameter)	Raw P-value	Adjusted P-value
Trpc4	-5584.52	0.0821953	0.958395	1.54426	0.0416048	NA	NA	NA	NA	NA	NA	NA
	-5573.91	0.323509	0.932608	1	0.0673918	0.0467876	0.932608	1	0.0673918	2.71339	4.10007e-06	NA

## Sheet: omega.by.tetrapod.group
Supplemental File S2. Selected model outputs of each evolutionary analysis are presented by page. The parameter ω is the estimated ratio of nonsynonymous to synonymous substitutions in the data set. NSsites and Model are control parameters used by PAML v. 4.9 (Yang Z. 2007. PAML 4: phylogenetic analysis by maximum likelihood. Molecular biology and evolution 24:1586–1591. DOI: 10.1093/molbev/msm08…
Gene	Clade	Sample size	Aligned codons	NSsites	Model	ω
Trpa1	Amphibians	11	108	0	0	0.17371
Trpc1	Amphibians	11	135	0	0	0.02151
Trpc3	Amphibians	10	165	0	0	0.0679
Trpc4	Amphibians	11	305	0	0	0.18398
Trpc5	Amphibians	11	342	0	0	0.09193
Trpc6	Amphibians	11	157	0	0	0.04577
Trpc7	Amphibians	NA	NA	NA	NA	NA
Trpm2	Amphibians	9	435	0	0	0.11681
Trpv1	Amphibians	8	120	0	0	0.09019
Trpa1	Birds	29	152	0	0	0.05451
Trpc1	Birds	39	135	0	0	0.00403
Trpc3	Birds	47	164	0	0	0.01129
Trpc4	Birds	51	337	0	0	0.18744
Trpc5	Birds	47	349	0	0	0.05686
Trpc6	Birds	47	161	0	0	0.04597
Trpc7	Birds	46	167	0	0	0.07449
Trpm2	Birds	30	437	0	0	0.08232
Trpv1	Birds	26	150	0	0	0.16215
Trpa1	Eutherian mammals	86	134	0	0	0.20729
Trpc1	Eutherian mammals	82	135	0	0	0.02083
Trpc3	Eutherian mammals	81	159	0	0	0.0399
Trpc4	Eutherian mammals	88	310	0	0	0.08005
Trpc5	Eutherian mammals	84	330	0	0	0.13655
Trpc6	Eutherian mammals	82	185	0	0	0.12405
Trpc7	Eutherian mammals	81	176	0	0	0.02909
Trpm2	Eutherian mammals	89	395	0	0	0.10959
Trpv1	Eutherian mammals	97	149	0	0	0.06287
Trpa1	Marsupials	7	141	0	0	0.31384
Trpc1	Marsupials	8	135	0	0	0.00812
Trpc3	Marsupials	8	165	0	0	0.0358
Trpc4	Marsupials	7	340	0	0	0.12681
Trpc5	Marsupials	7	363	0	0	0.11397
Trpc6	Marsupials	8	166	0	0	0.06522
Trpc7	Marsupials	8	172	0	0	0.10814
Trpm2	Marsupials	7	442	0	0	0.01585
Trpv1	Marsupials	8	147	0	0	0.04092
Trpa1	Nonavian sauropsids	17	138	0	0	0.11453
Trpc1	Nonavian sauropsids	15	135	0	0	0.03045
Trpc3	Nonavian sauropsids	15	165	0	0	0.08181
Trpc4	Nonavian sauropsids	17	325	0	0	0.22592
Trpc5	Nonavian sauropsids	17	345	0	0	0.05866
Trpc6	Nonavian sauropsids	17	160	0	0	0.08641
Trpc7	Nonavian sauropsids	16	167	0	0	0.05178
Trpm2	Nonavian sauropsids	9	442	0	0	0.18517
Trpv1	Nonavian sauropsids	14	114	0	0	0.06139

## Sheet: Ucp1-inactivated.branch.tests
Supplemental File S2. Selected model outputs of each evolutionary analysis are presented by page. The parameter ω is the estimated ratio of nonsynonymous to synonymous substitutions in the data set. NSsites and Model are control parameters used by PAML v. 4.9 (Yang Z. 2007. PAML 4: phylogenetic analysis by maximum likelihood. Molecular biology and evolution 24:1586–1591. DOI: 10.1093/molbev/msm08…
	PAML branch test of rate heterogeneity													RELAX test of rate heterogeneity																	BUSTED test of episodic diversifying selection
Gene	Background clade	Foreground clade	Sequences	Aligned codons	NSsites	Model	lnL	Background ω0	Foreground ω1	Hypothesis	Raw P-value	Adjusted P-value		lnL	Background ω0	Background p0	Background ω1	Background p1	Background ω2	Background p2	Foreground ω0	Foreground p0	Foreground ω1	Foreground p1	Foreground ω2	Foreground p2	k (rate change parameter)	Raw P-value	Adjusted P-value		lnL	Background ω0	Background p0	Background ω1	Background p1	Background ω2	Background p2	Foreground ω0	Foreground p0	Foreground ω1	Foreground p1	Foreground ω2 (ω2 constrained to 1 in null)	Foreground p2	Raw P-value	Adjusted P-value
Trpc4	Atlantogenata + Boreoeutheria	NA	46	318	0	0	-8926.85	0.07296	NA	Null	NA	NA		-9606.37	0.0137599	0.508358	0.175633	0.488687	2.57941	0.00295448	NA	NA	NA	NA	NA	NA	NA	NA	NA		-9461.83	NA	NA	NA	NA	NA	NA	NA	NA	NA	NA	NA	NA	NA	NA
Trpc4	Atlantogenata + Boreoeutheria background	Atlantogenata + Boreoeutheria Ucp1-inactive	46	318	0	2	-8916.84	0.05741	0.10147	Alternative	7.67493e-06	2.30248e-05		-9594.8	0	0.49437	0.146035	0.504016	5.19165	0.00161433	0	0.49437	0.26821	0.504016	3.08518	0.00161433	0.684016	1.49729e-06	4.491e-06		-9461.48	NA	NA	NA	NA	NA	NA	NA	NA	NA	NA	NA	NA	0.3538	NA
Trpc4	Atlantogenata		11	325	0	0	-4275.32	0.08765	NA	Null	NA	NA		-4462.31	0.103621	0.0606375	0.10367	0.936998	6.22612	0.00236414	NA	NA	NA	NA	NA	NA	NA	NA	NA		-4437.49	NA	NA	NA	NA	NA	NA	NA	NA	NA	NA	NA	NA	NA	NA
Trpc4	Atlantogenata background	Atlantogenata Ucp1-inactive	11	325	0	2	-4270.22	0.06524	0.11858	Alternative	0.0014029	0.00210435		-4456.03	0.0751056	0.957266	0.117666	0.041616	17.5374	0.00111834	0.144819	0.957266	0.202466	0.041616	8.48145	0.00111834	0.74638	0.000395223	0.0005928		-4437.49	NA	NA	NA	NA	NA	NA	NA	NA	NA	NA	NA	NA	0.5	NA
Trpc4	Boreoeutheria		35	329	0	0	-6252.04	0.07342	NA	Null	NA	NA		-6324.25	0.0494777	0.885691	0.402768	0.114309	1.00166	0	NA	NA	NA	NA	NA	NA	NA	NA	NA		NA (not calculated because unconstrained model includes no sites with ω > 1)	NA	NA	NA	NA	NA	NA	NA	NA	NA	NA	NA	NA	NA	NA
Trpc4	Boreoeutheria background	Boreoeutheria Ucp1-inactive	35	329	0	2	-6248.86	0.06312	0.09608	Alternative	0.0116287	0.0116287		-6318.4	0.0278458	0.886943	0.389761	0.107983	1.64932	0.00507373	0.0757256	0.886943	0.507126	0.107983	1.43416	0.00507373	0.720633	0.000627385	0.0006274		-6252.34	NA	NA	NA	NA	NA	NA	NA	NA	NA	NA	NA	NA	0.5	NA

## Sheet: omega.by.eutherian.order
Supplemental File S2. Selected model outputs of each evolutionary analysis are presented by page. The parameter ω is the estimated ratio of nonsynonymous to synonymous substitutions in the data set. NSsites and Model are control parameters used by PAML v. 4.9 (Yang Z. 2007. PAML 4: phylogenetic analysis by maximum likelihood. Molecular biology and evolution 24:1586–1591. DOI: 10.1093/molbev/msm08…
Gene	Clade	Sample size	Aligned codons	NSsites	Model	ω
Trpa1	Chiroptera	12	136	0	0	0.29363
Trpc1	Chiroptera	12	135	0	0	0.03795
Trpc3	Chiroptera	14	159	0	0	0.04386
Trpc4	Chiroptera	13	329	0	0	0.13171
Trpc5	Chiroptera	13	335	0	0	0.31925
Trpc6	Chiroptera	12	191	0	0	0.18487
Trpc7	Chiroptera	14	177	0	0	0.04271
Trpm2	Chiroptera	14	405	0	0	0.11344
Trpv1	Chiroptera	13	150	0	0	0.05971
Trpa1	Carnivora	12	136	0	0	0.37622
Trpc1	Carnivora	12	135	0	0	0.00798
Trpc3	Carnivora	15	165	0	0	0.07565
Trpc4	Carnivora	16	338	0	0	0.06139
Trpc5	Carnivora	14	337	0	0	0.09012
Trpc6	Carnivora	15	191	0	0	0.19883
Trpc7	Carnivora	16	177	0	0	0.01319
Trpm2	Carnivora	12	443	0	0	0.12694
Trpv1	Carnivora	12	151	0	0	0.07512
Trpa1	Artiodacytla	18	136	0	0	0.25605
Trpc1	Artiodacytla	31	135	0	0	0.00451
Trpc3	Artiodacytla	30	165	0	0	0.05713
Trpc4	Artiodacytla	31	340	0	0	0.08753
Trpc5	Artiodacytla	28	337	0	0	0.11421
Trpc6	Artiodacytla	31	191	0	0	0.12064
Trpc7	Artiodacytla	30	176	0	0	0.04801
Trpm2	Artiodacytla	27	440	0	0	0.13645
Trpv1	Artiodacytla	30	151	0	0	0.10494
Trpa1	Primates	12	136	0	0	0.22631
Trpc1	Primates	14	135	0	0	0.02906
Trpc3	Primates	16	165	0	0	0.05912
Trpc4	Primates	13	333	0	0	0.10054
Trpc5	Primates	13	335	0	0	0.11932
Trpc6	Primates	16	191	0	0	0.17093
Trpc7	Primates	16	176	0	0	0.04763
Trpm2	Primates	15	444	0	0	0.09423
Trpv1	Primates	16	149	0	0	0.04775
Trpa1	Rodentia	30	135	0	0	0.12037
Trpc1	Rodentia	31	135	0	0	0.01576
Trpc3	Rodentia	29	165	0	0	0.03437
Trpc4	Rodentia	30	332	0	0	0.07754
Trpc5	Rodentia	30	334	0	0	0.10842
Trpc6	Rodentia	30	190	0	0	0.09598
Trpc7	Rodentia	29	176	0	0	0.02232
Trpm2	Rodentia	25	439	0	0	0.12057
Trpv1	Rodentia	25	151	0	0	0.04306

## Sheet: chiroptera.branch.tests
Supplemental File S2. Selected model outputs of each evolutionary analysis are presented by page. The parameter ω is the estimated ratio of nonsynonymous to synonymous substitutions in the data set. NSsites and Model are control parameters used by PAML v. 4.9 (Yang Z. 2007. PAML 4: phylogenetic analysis by maximum likelihood. Molecular biology and evolution 24:1586–1591. DOI: 10.1093/molbev/msm08…
				PAML branch test of rate heterogeneity												RELAX test of rate heterogeneity																	BUSTED test of episodic diversifying selection
Gene	Background clade	Hypothesis		Foreground clade	Sequences	Aligned codons	NSsites	Model	lnL	Background ω0	Foreground ω1	Raw P-value	Adjusted P-value		lnL	Background ω0	Background p0	Background ω1	Background p1	Background ω2	Background p2	Foreground ω0	Foreground p0	Foreground ω1	Foreground p1	Foreground ω2	Foreground p2	k (rate change parameter)	Raw P-value	Adjusted P-value		lnL	Background ω0	Background p0	Background ω1	Background p1	Background ω2	Background p2	Foreground ω0	Foreground p0	Foreground ω1	Foreground p1	Foreground ω2 (ω2 constrained to 1 in null)	Foreground p2	Raw P-value	Adjusted P-value
Trpc4	Chiroptera + Carnivora + Artiodactyla	Null		NA	42	328	0	0	-8573.86	0.10044	NA	NA	NA		-8769.51	0.0990818	0.854427	0.157133	0.139388	3.47277	0.00618465	NA	NA	NA	NA	NA	NA	NA	NA	NA		-8634.88	NA	NA	NA	NA	NA	NA	NA	NA	NA	NA	NA	NA	NA	NA
	Carnivora + Artiodactyla	Alternative		Chiroptera	42	328	0	2	-8559.36	0.06734	0.13231	7.23239e-08	9.64319e-08		-8746.41	2.95891e-06	0.904833	0.822856	0.0951665	1582.36	0	0.105759	0.904833	0.966178	0.0951665	3.6693	0	0.176471	1.05733e-11	1.59e-11		-8634.46	NA	NA	NA	NA	NA	NA	NA	NA	NA	NA	NA	NA	0.330372	0.495558
Trpc5	Chiroptera + Carnivora + Artiodactyla	Null		NA	43	335	0	0	-5470.28	0.17885	NA	NA	NA		-5434.65	0.163171	0.863829	0.241388	0.131633	11.4658	0.00453737	NA	NA	NA	NA	NA	NA	NA	NA	NA		-5377.73	0.107986	1	0.113912	0	0.131231	0	0	0.638788	0.35431	0	1	0.361212	NA	NA
	Carnivora + Artiodactyla	Alternative		Chiroptera	43	335	0	2	-5442.29	0.09394	0.31655	7.30087e-14	2.92035e-13		-5409.71	0	0.89098	0.0317862	0	1.17408	0.10902	0	0.89098	4.3591e-13	0	3.7601	0.10902	8.25272	1.63425e-12	4.89e-12		-5374.25	0.107986	0	0.107812	0.973773	0.147816	0.0262272	0	0.00363862	0.352286	0.995707	157.192	0.000654241	0.0153026	0.0459079
Trpc1	Chiroptera + Carnivora + Artiodactyla	Null		NA	61	135	0	0	-2271.48	0.02687	NA	NA	NA		-2251.08	0.00508367	0	0.0332194	1	1.36297	0	NA	NA	NA	NA	NA	NA	NA	NA	NA		NA (not calculated because unconstrained model includes no sites with ω > 1)	NA	NA	NA	NA	NA	NA	NA	NA	NA	NA	NA	NA	NA	NA
	Carnivora + Artiodactyla	Alternative		Chiroptera	61	135	0	2	-2267.25	0.00803	0.0364	0.00360945	0.00360945		-2245.87	7.66073e-11	0.829554	0.000518562	0.164486	1.56949	0.00596033	0.00936353	0.829554	0.219382	0.164486	1.0946	0.00596033	0.200535	0.000912693	0.000912693		-2228.62	NA	NA	NA	NA	NA	NA	NA	NA	NA	NA	NA	NA	0.5	0.5
Trpc4 (high GC taxa removed)	Chiroptera + Carnivora + Artiodactyla	Null		NA	37	333	0	0	-6368.49	0.09584	NA	NA	NA
	Carnivora + Artiodactyla	Alternative		Chiroptera	37	333	0	2	-6345.45	0.0658	0.19889	1.13069e-11	2.26138e-11

## Sheet: Ad-hoc branch tests
Supplemental File S2. Selected model outputs of each evolutionary analysis are presented by page. The parameter ω is the estimated ratio of nonsynonymous to synonymous substitutions in the data set. NSsites and Model are control parameters used by PAML v. 4.9 (Yang Z. 2007. PAML 4: phylogenetic analysis by maximum likelihood. Molecular biology and evolution 24:1586–1591. DOI: 10.1093/molbev/msm08…
Gene	ω0 clade	ω1 clade	Sequences	Aligned codons	NSsites	Model	lnL	ω0	ω1	Hypothesis	Raw P-value	Adjusted P-value
Trpc4	Artiodactyla		17	335	0	0	-2989.06	0.07602		Null
	Artiodactyla background	Camelus+Vicugna, ancestor and leaves	17	335	0	2	-2988.31	0.06785	0.09881	Alternative	0.222919	0.793333
	Artiodactyla background	Camelus+Vicugna, ancestor only	17	335	0	2	-2988.8	0.07143	0.0897	Alternative	0.47442	0.793333
Trpc4	Rodentia		30	332	0	0	-5964.93	0.07754		Null
	Rodentia background	Dipodomys+Perognathus, ancestor and leaves	30	332	0	2	-5964.91	0.07817	0.0753	Alternative	0.850889	0.8509
	Rodentia background	Dipodomys+Perognathus, ancestor only	30	332	0	2	-5964.79	0.0763	0.08754	Alternative	0.595032	0.793333
